# Supplementary material
Source: publisher figshare collection journal article supplement (https://acs.figshare.com/ndownloader/files/4633303)
Supplement: Supplementary file 1 [file 4633303]

# SUPPORTING INFORMATION

## **Organo- $\text{I}^{\text{n}}$ , $\text{d}^0$ -Mediated Synthesis of Amine-Capped Polyethylenes. Scope and Mechanism**

Smruti B. Amin, SungYong Seo and Tobin J. Marks\*

*Department of Chemistry, Northwestern University, 2145 Sheridan Road, Evanston, Illinois 60208*

E-mail: [t-marks@northwestern.edu](mailto:t-marks@northwestern.edu)

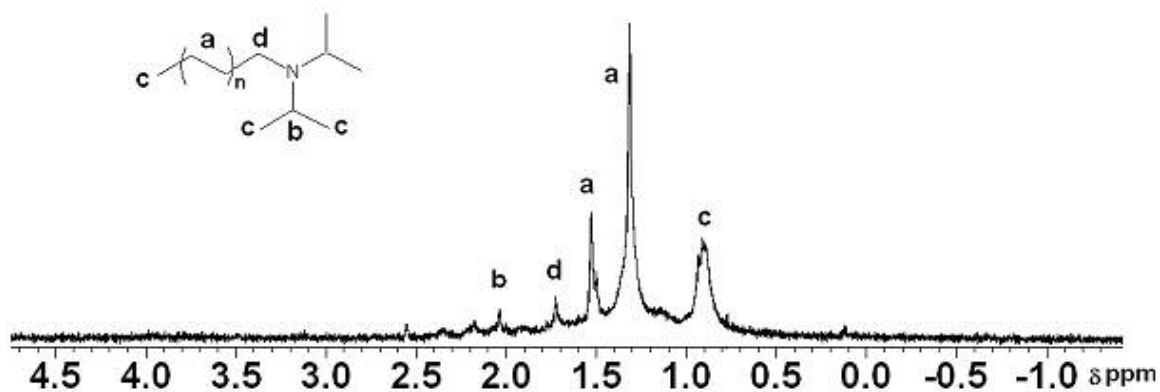

**Figure S1.**  $^1\text{H}$  NMR (400 MHz,  $\text{C}_2\text{D}_2\text{Cl}_4$ , 130  $^\circ\text{C}$ ) spectrum of a di-*iso*-propylamine-capped oligoethylene produced by  $\text{Cp}'_2\text{La}$ -mediated ethylene polymerization in the presence of di-*iso*-propylamine.

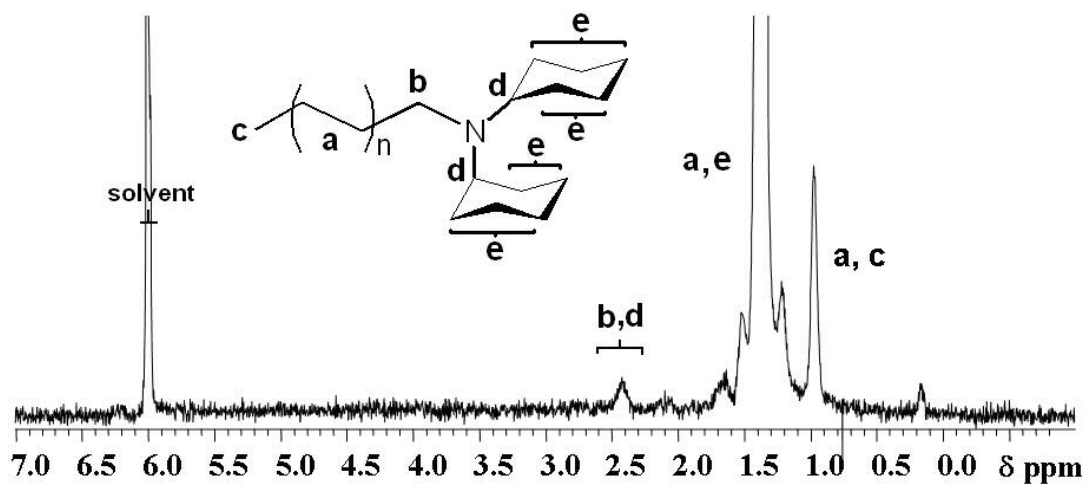

**Figure S2.**  $^1\text{H}$  NMR (400 MHz,  $\text{C}_2\text{D}_2\text{Cl}_4$ , 130  $^\circ\text{C}$ ) spectrum of a dicyclohexylamine-capped polyethylene produced by  $\text{CGCTiMe}_2/\text{Ph}_3\text{C}^+\text{B}(\text{C}_6\text{F}_5)_4^-$ -mediated ethylene polymerization in the presence of dicyclohexylamine.

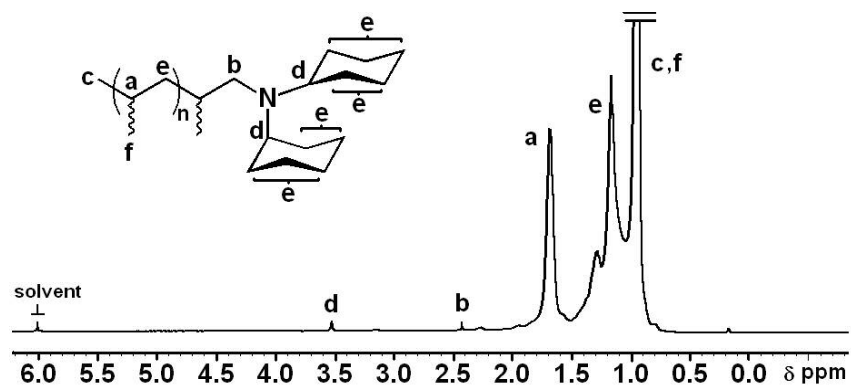

**Figure S3.**  $^1\text{H}$  NMR (400 MHz,  $\text{C}_2\text{D}_2\text{Cl}_4$ , 130  $^\circ\text{C}$ ) spectrum of a dicyclohexylamine-capped atactic polypropylene produced by  $\text{CGCTiMe}_2/\text{Ph}_3\text{C}^+\text{B}(\text{C}_6\text{F}_5)_4^-$ -mediated propylene polymerization in the presence of dicyclohexylamine.
